# Supplementary material for: Flow-Enhanced Photothermal Spectroscopy
Source: MDPI journal article supplement (doi:10.3390/s22197148), 2022-09-21
Supplement: s1 [file s1]

## Supplementary Materials: Derivation of Equation (5)

The model's time-resolved, three-dimensional temperature distribution  $T(x, y, z, t)$  used in the main text is deduced in the following. The approach is analogous to that for two dimensions, described concisely in [2] and in more details in chapter three in [1]. The variables whose meaning is not described below are explained in the main text.

Here, the heating source, i.e., a laser beam, propagates along with the moving fluid in the x-direction. Thermal diffusivity is considered in all directions. The derivation starts with the temperature differential equation, which is found in the main text and writes as:

$$\frac{\partial T(x, y, z, t)}{\partial t} = D \nabla^2 T(x, y, z, t) - v_x \nabla T(x, y, z, t) + \frac{1}{\rho c_p} Q(x, y, z, t). \quad (1)$$

The Green's function method solves Equation (1), yielding:

$$T(x, y, z, t) = \int_0^\infty \int_{-\infty}^\infty \int_{-\infty}^\infty \int_{-\infty}^\infty Q(\xi, \eta, \theta, \tau) G(x/\xi; y/\eta; z/\theta; t/\tau) d\xi d\eta d\theta d\tau, \quad (2)$$

with  $G$  being the Green's function and  $Q$  the heat. The latter is defined as:

$$Q(x, y, z, t) = \frac{2\alpha E_0}{\pi a^2 t_0} e^{-2(y^2 + z^2)/a^2} \quad (3)$$

for  $0 \leq t \leq t_0 \wedge x_0 \leq x \leq x_1$ ,

with  $E_0$  and  $t_0$  being the total energy and time duration of one laser pulse, respectively. For  $t > t_0$ ,  $Q(x, y, z, t)$  is zero.

The differential equation for the Green's function is:

$$-D \nabla_{xyz}^2 G + v_x \frac{\partial G}{\partial x} + \frac{\partial G}{\partial t} = \frac{1}{\rho c_p} \delta(x - \xi) \delta(y - \eta) \delta(z - \theta) \delta(t - \tau), \quad (4)$$

with the boundary conditions being:

$$\begin{aligned} G(\pm\infty/\xi; y/\eta; z/\theta; t/\tau) &= 0, \\ G(x/\xi; \pm\infty/\eta; z/\theta; t/\tau) &= 0, \\ G(x/\xi; y/\eta; \pm\infty/\theta; t/\tau) &= 0, \\ G(x/\xi; y/\eta; z/\theta; 0/\tau) &= 0. \end{aligned} \quad (5)$$

Fourier transform of Equation (4) is:

$$(\omega_x^2 + \omega_y^2 + \omega_z^2)D G_F - i\omega_x v_x G_F + \frac{\partial G_F}{\partial t} = \frac{1}{(2\pi)^{3/2} \rho c_p} e^{i(\omega_x \xi + \omega_y \eta + \omega_z \theta)} \delta(t - \tau). \quad (6)$$

Laplace transform of Equation (6) gives:

$$(\omega_x^2 + \omega_y^2 + \omega_z^2)D G_{FL} - i\omega_x v_x G_{FL} + s G_{FL} = \frac{1}{(2\pi)^{3/2} \rho c_p} e^{i(\omega_x \xi + \omega_y \eta + \omega_z \theta)} e^{-s\tau}. \quad (7)$$

The solution of Equation (7) is:

$$G_{FL} = \frac{e^{i\omega_x \xi} e^{i\omega_y \eta} e^{i\omega_z \theta} e^{-s\tau}}{(2\pi)^{3/2} \rho c_p [D(\omega_x^2 + \omega_y^2 + \omega_z^2) - i\omega_x v_x + s]}. \quad (8)$$

The inverse Laplace transform of  $G_{FL}$  gives:

$$G_F = \frac{e^{i\omega_x \xi} e^{i\omega_y \eta} e^{i\omega_z \theta} H_\tau(t)}{(2\pi)^{3/2} \rho c_p} e^{(i\omega_x v_x - (\omega_x^2 + \omega_y^2 + \omega_z^2)D)(t-\tau)}, \quad (9)$$

with  $H_\tau(t)$  being the Heaviside function:

$$H_\tau(t) = \begin{cases} 0 & \text{for } 0 \leq t < \tau \\ 1 & \text{for } t \geq \tau. \end{cases} \quad (10)$$

The inverse Fourier transform of  $G_F$  yields the Green's function:

$$G = \frac{H_\tau(t)}{(2\pi)^{3/2} \rho c_p} \frac{1}{(2\pi)^{3/2}} \int_{-\infty}^{\infty} e^{i\omega_x(\xi + v_x(t-\tau))} e^{-\omega_x^2 D(t-\tau)} e^{-i\omega_x x} d\omega_x \\ \cdot \int_{-\infty}^{\infty} e^{i\omega_y \eta} e^{-\omega_y^2 D(t-\tau)} e^{-i\omega_y y} d\omega_y \\ \cdot \int_{-\infty}^{\infty} e^{i\omega_z \theta} e^{-\omega_z^2 D(t-\tau)} e^{-i\omega_z z} d\omega_z. \quad (11)$$

For solving the integrals in Equation (11), the convolution theorem is used, which, in the following exemplarily for  $x$ , has the form:

$$\int_{-\infty}^{\infty} F(\omega_x) G(\omega_x) e^{-i\omega_x x} d\omega_x = \int_{-\infty}^{\infty} \mathcal{F}_{\omega_x}^{-1}\{F(\omega_x)\}(\lambda) \mathcal{F}_{\omega_x}^{-1}\{G(\omega_x)\}(x-\lambda) d\lambda \\ = \int_{-\infty}^{\infty} f(\lambda) g(x-\lambda) d\lambda. \quad (12)$$

Applying the convolution theorem, the first integral in Equation (11) writes as:

$$\int_{-\infty}^{\infty} \mathcal{F}_{\omega_x}^{-1}\{e^{-\omega_x^2 D(t-\tau)}\}(\lambda) \mathcal{F}_{\omega_x}^{-1}\{e^{i\omega_x(\xi + v_x(t-\tau))}\}(x-\lambda) d\lambda \\ = \int_{-\infty}^{\infty} \frac{1}{\sqrt{2}\sqrt{D(t-\tau)}} e^{-\lambda^2/(4D(t-\tau))} \sqrt{2\pi} \delta((x-\lambda) - v(t-\tau) - \xi) d\lambda \\ = \frac{\sqrt{\pi}}{\sqrt{D(t-\tau)}} e^{-(x-\xi - v(t-\tau))^2/(4D(t-\tau))}. \quad (13)$$

The second integral in Equation (11) writes as:

$$\int_{-\infty}^{\infty} \mathcal{F}_{\omega_y}^{-1}\{e^{-\omega_y^2 D(t-\tau)}\}(\lambda) \mathcal{F}_{\omega_y}^{-1}\{e^{i\omega_y \eta}\}(y-\lambda) d\lambda \\ = \int_{-\infty}^{\infty} \frac{1}{\sqrt{2}\sqrt{D(t-\tau)}} e^{-\lambda^2/(4D(t-\tau))} \sqrt{2\pi} \delta((y-\lambda) - \eta) d\lambda \\ = \frac{\sqrt{\pi}}{\sqrt{D(t-\tau)}} e^{-(y-\eta)^2/(4D(t-\tau))}. \quad (14)$$

The third integral solves equally to the latter for  $(y \rightarrow z, \eta \rightarrow \theta)$ .

The Green's function in a simpler form is obtained by substituting the solutions of the Equations (13) to (14) back into Equation (11):

$$\begin{aligned}
 G &= \frac{H_\tau(t)}{(2\pi)^3 \rho c_p} \frac{\pi^{3/2}}{(D(t-\tau))^{3/2}} e^{-(x-\xi-v(t-\tau))^2/(4D(t-\tau))} e^{-(y-\eta)^2/(4D(t-\tau))} e^{-(z-\theta)^2/(4D(t-\tau))} \\
 &= \frac{H_\tau(t)}{8\pi^{3/2} \rho c_p (D(t-\tau))^{3/2}} e^{-((x-\xi-v(t-\tau))^2 - (y-\eta)^2 - (z-\theta)^2)/(4D(t-\tau))}.
 \end{aligned} \quad (15)$$

Substitution of  $G$  from Equation (15) and  $Q$  from Equation (3) into Equation (2) yields the result:

$$\begin{aligned}
 T(x, y, z, t) &= \int_0^{t_0} \frac{2\alpha E_0}{\pi a^2 t_0} \frac{1}{8\pi^{3/2} \rho c_p (D(t-\tau))^{3/2}} \\
 &\quad \cdot \int_{-\infty}^{\infty} \int_{-\infty}^{\infty} \int_{x_0}^{x_1} e^{-((x-\xi-v(t-\tau))^2 - (y-\eta)^2 - (z-\theta)^2)/(4D(t-\tau))} e^{-2(\eta^2 + \theta^2)/a^2} d\xi d\eta d\theta d\tau \\
 &= \int_0^{t_0} \frac{\alpha E_0}{4\pi^{5/2} \rho c_p a^2 t_0 (D(t-\tau))^{3/2}} \int_{-\infty}^{\infty} \int_{-\infty}^{\infty} \int_{x_0}^{x_1} e^{-(x-\xi-v(t-\tau))^2/(4D(t-\tau))} \\
 &\quad \cdot e^{-2\eta^2/a^2} e^{-(y-\eta)^2/(4D(t-\tau))} e^{-2\theta^2/a^2} e^{-(z-\theta)^2/(4D(t-\tau))} d\xi d\eta d\theta d\tau \\
 &= \int_0^{t_0} \frac{\alpha E_0}{4\pi^{5/2} \rho c_p a^2 t_0 (D(t-\tau))^{3/2}} \sqrt{\pi} \sqrt{D(t-\tau)} \\
 &\quad \cdot \left( -\operatorname{erf}\left\{ \frac{-x+v(t-\tau)+x_0}{2\sqrt{D(t-\tau)}} \right\} + \operatorname{erf}\left\{ \frac{-x+v(t-\tau)+x_1}{2\sqrt{D(t-\tau)}} \right\} \right) \\
 &\quad \cdot \int_{-\infty}^{\infty} \int_{-\infty}^{\infty} e^{-2\eta^2/a^2} e^{-(y-\eta)^2/(4D(t-\tau))} e^{-2\theta^2/a^2} e^{-(z-\theta)^2/(4D(t-\tau))} d\eta d\theta d\tau \\
 &= \int_0^{t_0} \frac{\alpha E_0}{4\pi^2 \rho c_p a^2 t_0 D(t-\tau)} 4\pi a^2 D(t-\tau) \frac{1}{a^2 + 8D(t-\tau)} \\
 &\quad \cdot \left( -\operatorname{erf}\left\{ \frac{-x+v(t-\tau)+x_0}{2\sqrt{D(t-\tau)}} \right\} + \operatorname{erf}\left\{ \frac{-x+v(t-\tau)+x_1}{2\sqrt{D(t-\tau)}} \right\} \right) \\
 &\quad \cdot e^{-2(y^2+z^2)/(a^2+8D(t-\tau))} d\tau \\
 &= \int_0^{t_0} \frac{\alpha E_0}{\pi \rho c_p t_0 (a^2 + 8D(t-\tau))} \cdot e^{-2(y^2+z^2)/(a^2+8D(t-\tau))} \\
 &\quad \cdot \left( -\operatorname{erf}\left\{ \frac{-x+v(t-\tau)+x_0}{2\sqrt{D(t-\tau)}} \right\} + \operatorname{erf}\left\{ \frac{-x+v(t-\tau)+x_1}{2\sqrt{D(t-\tau)}} \right\} \right) d\tau \\
 &\quad \text{for } t \geq t_0 \wedge x_0 \leq x \leq x_1,
 \end{aligned} \quad (16)$$

with  $\operatorname{erf}$  being the Gauss error function.

We are considering a time-dependent input power source, e.g., a modulated laser beam. Thus the time-independent term  $E_0/t_0$ , i.e.,  $P_0$ , is substituted by the time-dependent term  $P(t)$ . We define  $\tilde{T}(x, y, z, t) = T(x, y, z, t) / P_0$ , and express  $T(x, y, z, t)$  as convolution of  $P(t)$  and  $\tilde{T}(x, y, z, t)$ :

$$T(x, y, z, t) = (P \otimes \tilde{T}(x, y, z))(t) = \int_0^t P(\tau) \tilde{T}(x, y, z, t - \tau) d\tau. \quad (17)$$

This leads to the following expression:

$$T(x, y, z, t) = \frac{\alpha}{\pi \rho c_p} \int_0^t P(\tau) \frac{e^{-2(y^2 + z^2)/(a^2 + 8D(t-\tau))}}{a^2 + 8D(t-\tau)} \cdot \left( -\operatorname{erf} \left\{ \frac{-x + v(t-\tau) + x_0}{2\sqrt{D(t-\tau)}} \right\} + \operatorname{erf} \left\{ \frac{-x + v(t-\tau) + x_1}{2\sqrt{D(t-\tau)}} \right\} \right) d\tau \quad (18)$$

for  $x_0 \leq x \leq x_1$ .

We further include  $R'(t)$  into (18), which is a function of the target- and fluid-specific excitation relaxation time  $\tau_E$  and accounts for the delayed heat release from the excited molecules:

$$R'(t) = \frac{e^{-t/\tau_E}}{\tau_E}. \quad (19)$$

Combining this with the definition of  $x_0$  as zero leads to the final expression for the temperature distribution found in the main text:

$$T(x, y, z, t) = \frac{\alpha}{\pi \rho c_p} \int_0^t P(\tau) R'(\tau) \frac{e^{-2(y^2 + z^2)/(a^2 + 8D(t-\tau))}}{a^2 + 8D(t-\tau)} \cdot \left( -\operatorname{erf} \left\{ \frac{-x + v(t-\tau)}{2\sqrt{D(t-\tau)}} \right\} + \operatorname{erf} \left\{ \frac{-x + v(t-\tau) + x_1}{2\sqrt{D(t-\tau)}} \right\} \right) d\tau \quad (20)$$

for  $0 \leq x \leq x_1$ .

## References

1. Sell, J. *Photothermal Investigations of Solids and Fluids*; Elsevier: Amsterdam, The Netherlands, 2012.
2. Rose, A.; Vyas, R.; Gupta, R. Pulsed photothermal deflection spectroscopy in a flowing medium: A quantitative investigation. *Appl. Opt.* **1986**, *25*, 4626–4643.
